# Supplementary material
Source: HighWire-hosted journal article supplement (https://www.rcpjournals.org/highwire/filestream/13957/field_highwire_adjunct_files/0/Botham_supplementary_material_S1.pdf)
Supplement: Botham_supplementary_material_S1.pdf [file Botham_supplementary_material_S1.pdf]

## Appendix 1: Search strategy conducted in MEDLINE and adjusted for other databases

---

1. Public
  2. Citizen
  3. Patient
  4. Or / 1-3
  5. Understand\*
  6. Attitude
  7. Opinion
  8. Perception
  9. Aware\*
  10. Perspective
  11. Concern
  12. Knowledge
  13. Or / 5-12
  14. "Personalized medicine"
  15. "Precision medicine"
  16. "Individual\* medicine"
  17. "Targeted therapy"
  18. Pharmacogenomics
  19. Or/ 14-19
  20. Cancer
  21. Oncology
  22. Or/ 21-22
  23. 4 AND 13 AND 20 AND 22
  24. Limit 23 to English language
-
